# Supplementary material for: Southern right whale Eubalaena australis in Golfo San Matías (Patagonia, Argentina): Evidence of recolonisation
Source: PLoS One. 2018 Dec 19;13(12):e0207524. doi: 10.1371/journal.pone.0207524 (PMC6300193; doi:10.1371/journal.pone.0207524)
Supplement: S5 Table — Group types and total number of whales recorded per segment in each hotspot. The data were extracted from 11 flights performed in Golfo San Matías and 11 flights performed in Península Valdés. Hotspots: Golfo Nuevo, Golfo San José, Golfo San Matías; Group: Mother calf pair, Solitary animal, Breeding group. (XLSX) [file pone.0207524.s005.xlsx]

## Sheet: Hoja1
Hotspot	Number of individuals	Group
Golfo Nuevo	28	Mother calf pair
Golfo Nuevo	28	Mother calf pair
Golfo Nuevo	164	Mother calf pair
Golfo Nuevo	260	Mother calf pair
Golfo Nuevo	184	Mother calf pair
Golfo Nuevo	220	Mother calf pair
Golfo Nuevo	128	Mother calf pair
Golfo Nuevo	116	Mother calf pair
Golfo Nuevo	108	Mother calf pair
Golfo Nuevo	152	Mother calf pair
Golfo Nuevo	164	Mother calf pair
Golfo Nuevo	124	Mother calf pair
Golfo Nuevo	128	Mother calf pair
Golfo Nuevo	102	Mother calf pair
Golfo Nuevo	111	Mother calf pair
Golfo Nuevo	118	Mother calf pair
Golfo Nuevo	151	Mother calf pair
Golfo Nuevo	66	Mother calf pair
Golfo Nuevo	74	Mother calf pair
Golfo Nuevo	110	Mother calf pair
Golfo Nuevo	48	Mother calf pair
Golfo Nuevo	10	Mother calf pair
Golfo Nuevo	20	Mother calf pair
Golfo Nuevo	8	Mother calf pair
Golfo Nuevo	50	Solitary animal
Golfo Nuevo	40	Solitary animal
Golfo Nuevo	66	Solitary animal
Golfo Nuevo	61	Solitary animal
Golfo Nuevo	37	Solitary animal
Golfo Nuevo	52	Solitary animal
Golfo Nuevo	30	Solitary animal
Golfo Nuevo	39	Solitary animal
Golfo Nuevo	48	Solitary animal
Golfo Nuevo	41	Solitary animal
Golfo Nuevo	42	Solitary animal
Golfo Nuevo	32	Solitary animal
Golfo Nuevo	47	Solitary animal
Golfo Nuevo	42	Solitary animal
Golfo Nuevo	29	Solitary animal
Golfo Nuevo	34	Solitary animal
Golfo Nuevo	21	Solitary animal
Golfo Nuevo	35	Solitary animal
Golfo Nuevo	12	Solitary animal
Golfo Nuevo	25	Solitary animal
Golfo Nuevo	22	Solitary animal
Golfo Nuevo	21	Solitary animal
Golfo Nuevo	25	Solitary animal
Golfo Nuevo	21	Solitary animal
Golfo Nuevo	26	Breeding group
Golfo Nuevo	14	Breeding group
Golfo Nuevo	24	Breeding group
Golfo Nuevo	35	Breeding group
Golfo Nuevo	17	Breeding group
Golfo Nuevo	24	Breeding group
Golfo Nuevo	13	Breeding group
Golfo Nuevo	14	Breeding group
Golfo Nuevo	28	Breeding group
Golfo Nuevo	14	Breeding group
Golfo Nuevo	11	Breeding group
Golfo Nuevo	11	Breeding group
Golfo Nuevo	19	Breeding group
Golfo Nuevo	24	Breeding group
Golfo Nuevo	7	Breeding group
Golfo Nuevo	24	Breeding group
Golfo Nuevo	9	Breeding group
Golfo Nuevo	4	Breeding group
Golfo Nuevo	2	Breeding group
Golfo Nuevo	17	Breeding group
Golfo Nuevo	13	Breeding group
Golfo Nuevo	6	Breeding group
Golfo Nuevo	17	Breeding group
Golfo Nuevo	25	Breeding group
Golfo San José	138	Mother calf pair
Golfo San José	163	Mother calf pair
Golfo San José	130	Mother calf pair
Golfo San José	132	Mother calf pair
Golfo San José	218	Mother calf pair
Golfo San José	144	Mother calf pair
Golfo San José	92	Mother calf pair
Golfo San José	64	Mother calf pair
Golfo San José	32	Solitary animal
Golfo San José	43	Solitary animal
Golfo San José	29	Solitary animal
Golfo San José	44	Solitary animal
Golfo San José	45	Solitary animal
Golfo San José	58	Solitary animal
Golfo San José	29	Solitary animal
Golfo San José	42	Solitary animal
Golfo San José	11	Breeding group
Golfo San José	16	Breeding group
Golfo San José	2	Breeding group
Golfo San José	14	Breeding group
Golfo San José	22	Breeding group
Golfo San José	26	Breeding group
Golfo San José	11	Breeding group
Golfo San José	8	Breeding group
Golfo San Matías	8	Mother calf pair
Golfo San Matías	2	Mother calf pair
Golfo San Matías	6	Mother calf pair
Golfo San Matías	6	Mother calf pair
Golfo San Matías	0	Mother calf pair
Golfo San Matías	0	Mother calf pair
Golfo San Matías	0	Mother calf pair
Golfo San Matías	2	Mother calf pair
Golfo San Matías	8	Mother calf pair
Golfo San Matías	8	Mother calf pair
Golfo San Matías	2	Mother calf pair
Golfo San Matías	4	Mother calf pair
Golfo San Matías	0	Mother calf pair
Golfo San Matías	0	Mother calf pair
Golfo San Matías	0	Mother calf pair
Golfo San Matías	0	Mother calf pair
Golfo San Matías	0	Mother calf pair
Golfo San Matías	0	Mother calf pair
Golfo San Matías	10	Solitary animal
Golfo San Matías	16	Solitary animal
Golfo San Matías	16	Solitary animal
Golfo San Matías	12	Solitary animal
Golfo San Matías	23	Solitary animal
Golfo San Matías	16	Solitary animal
Golfo San Matías	16	Solitary animal
Golfo San Matías	48	Solitary animal
Golfo San Matías	36	Solitary animal
Golfo San Matías	30	Solitary animal
Golfo San Matías	30	Solitary animal
Golfo San Matías	18	Solitary animal
Golfo San Matías	19	Solitary animal
Golfo San Matías	10	Solitary animal
Golfo San Matías	19	Solitary animal
Golfo San Matías	11	Solitary animal
Golfo San Matías	14	Solitary animal
Golfo San Matías	6	Solitary animal
Golfo San Matías	6	Breeding group
Golfo San Matías	4	Breeding group
Golfo San Matías	10	Breeding group
Golfo San Matías	9	Breeding group
Golfo San Matías	10	Breeding group
Golfo San Matías	3	Breeding group
Golfo San Matías	24	Breeding group
Golfo San Matías	6	Breeding group
Golfo San Matías	5	Breeding group
Golfo San Matías	3	Breeding group
Golfo San Matías	15	Breeding group
Golfo San Matías	11	Breeding group
Golfo San Matías	4	Breeding group
Golfo San Matías	2	Breeding group
Golfo San Matías	4	Breeding group
Golfo San Matías	4	Breeding group
Golfo San Matías	3	Breeding group
Golfo San Matías	2	Breeding group
